# Supplementary material for: GEI-8, a Homologue of Vertebrate Nuclear Receptor Corepressor NCoR/SMRT, Regulates Gonad Development and Neuronal Functions in Caenorhabditis elegans
Source: PubMed Central journal article supplement (PMC3590189; doi:10.1371/journal.pone.0058462), 2013-03-06
Supplement: pone.0058462.s005.pdf [file pone.0058462.s005.pdf]

**Table S2. List of genes with increased expression in *gei-8(ok1671)* homozygous mutants.**

| Gene WB ID     | Gene Public Name | Oligo Set   |
|----------------|------------------|-------------|
| WBGene00006928 | vit-4            | 171723_x_at |
| WBGene00011737 | T12G3.1          | 171737_x_at |
| WBGene00011474 | T05D4.1          | 171820_x_at |
| WBGene00000783 | cpr-3            | 172069_x_at |
| WBGene00006927 | vit-3            | 172133_x_at |
| WBGene00006928 | vit-4            | 172134_x_at |
| WBGene00019207 | H17B01.1         | 172183_at   |
| WBGene00011733 | T12D8.5          | 172193_at   |
| WBGene00007992 | fipr-24          | 172241_x_at |
| WBGene00003769 | nlp-31           | 172343_x_at |
| WBGene00003767 | nlp-29           | 172375_x_at |
| WBGene00003768 | nlp-30           | 172386_x_at |
| WBGene00003765 | nlp-27           | 172388_x_at |
| WBGene00003766 | nlp-28           | 172427_x_at |
| WBGene00000556 | cnc-2            | 172437_x_at |
| WBGene00017232 | F07G11.7         | 172508_x_at |
| WBGene00012813 | Y43F8B.2         | 172578_x_at |
| WBGene00017396 | F12A10.7         | 172686_x_at |
| WBGene00006929 | vit-5            | 172696_x_at |
| WBGene00000599 | col-10           | 172723_x_at |
| WBGene00003473 | mtl-1            | 172744_at   |
| WBGene00002020 | hsp-16.49        | 172901_x_at |
| WBGene00008741 | F13D12.6         | 172958_s_at |
| WBGene00000219 | asp-6            | 173036_s_at |
| WBGene00020311 | T07D3.9          | 173073_s_at |
| WBGene00008741 | F13D12.6         | 173089_at   |
| WBGene00009396 | clec-65          | 173090_s_at |
| WBGene00021872 | clec-85          | 173144_at   |
| WBGene00003702 | nhr-112          | 173159_s_at |
| WBGene00022199 | Y71H10A.1        | 173265_at   |
| WBGene00012185 | W01F3.2          | 173274_s_at |
| WBGene00001564 | gei-7            | 173301_s_at |
| WBGene00011305 | R186.1           | 173404_s_at |
| WBGene00006930 | vit-6            | 173411_s_at |
| WBGene00003891 | osm-11           | 173523_s_at |
| WBGene00015163 | B0361.9          | 173537_at   |
| WBGene00001685 | gpd-3            | 173608_s_at |
| WBGene00011231 | R11A5.3          | 173687_s_at |
| WBGene00015132 | B0303.14         | 173796_at   |
| WBGene00008780 | F14B4.2          | 173814_at   |
| WBGene00000065 | act-3            | 173992_at   |
| WBGene00017854 | F27C1.4          | 174134_at   |

|                |            |             |
|----------------|------------|-------------|
| WBGene00009243 | F29C6.1    | 174420_at   |
| WBGene00002263 | lea-1      | 174552_s_at |
| WBGene00009221 | acs-2      | 174675_at   |
| WBGene00010659 | K08D8.5    | 175126_s_at |
| WBGene00021219 | Y19D10A.4  | 175253_s_at |
| WBGene00007533 | C12C8.2    | 175512_s_at |
| WBGene00021219 | Y19D10A.4  | 175532_at   |
| WBGene00016048 | C24B9.3    | 175591_s_at |
| WBGene00003166 | mec-2      | 175614_at   |
| WBGene00020135 | T01B6.3    | 176009_at   |
| WBGene00021518 | Y41D4B.16  | 176044_at   |
| WBGene00005501 | srh-297    | 176127_at   |
| WBGene00021977 | Y58A7A.3   | 176141_s_at |
| WBGene00021979 | Y58A7A.5   | 176209_at   |
| WBGene00021219 | Y19D10A.4  | 176338_at   |
| WBGene00018028 | F35B3.1    | 176689_at   |
| WBGene00016658 | C45B2.1    | 176692_s_at |
| WBGene00016662 | C45B2.8    | 176692_s_at |
| WBGene00021491 | Y40B10A.6  | 176851_at   |
| WBGene00000066 | act-4      | 176923_s_at |
| WBGene00021945 | Y55F3BR.8  | 177095_at   |
| WBGene00044757 | Y55F3BR.11 | 177095_at   |
| WBGene00021396 | Y38C1AA.5  | 177112_at   |
| WBGene00019207 | H17B01.1   | 177128_at   |
| WBGene00019780 | M60.4      | 177279_at   |
| WBGene00010935 | M163.1     | 177298_at   |
| WBGene00011293 | R102.6     | 177339_at   |
| WBGene00019779 | M60.2      | 177375_at   |
| WBGene00007807 | C29F3.7    | 177487_at   |
| WBGene00012034 | T26C5.4    | 177598_at   |
| WBGene00010216 | F57G8.7    | 177613_at   |
| WBGene00009485 | F36G9.3    | 177718_at   |
| WBGene00012408 | Y7A5A.2    | 177799_at   |
| WBGene00011706 | T11B7.1    | 177991_at   |
| WBGene00009623 | F41E7.7    | 178094_at   |
| WBGene00012044 | T26E4.2    | 178235_at   |
| WBGene00011979 | T24B8.5    | 178297_at   |
| WBGene00007989 | fipr-22    | 178571_s_at |
| WBGene00008681 | scrm-4     | 178635_at   |
| WBGene00002107 | ins-24     | 178669_s_at |
| WBGene00009803 | F47B8.2    | 178834_at   |
| WBGene00012140 | T28F4.5    | 178922_at   |
| WBGene00010041 | F54C9.3    | 179078_s_at |
| WBGene00008217 | C50B6.1    | 179079_at   |
| WBGene00008816 | F14F8.8    | 179137_at   |
| WBGene00008157 | C47F8.1    | 179143_at   |
| WBGene00009787 | F46F2.3    | 179187_s_at |
| WBGene00010019 | F54B8.4    | 179214_at   |
| WBGene00008862 | F15D4.5    | 179266_at   |

|                |           |             |
|----------------|-----------|-------------|
| WBGene00007365 | C06B3.6   | 179272_at   |
| WBGene00014053 | ZK669.3   | 179285_at   |
| WBGene00009199 | F28B1.5   | 179364_at   |
| WBGene00012398 | Y6E2A.4   | 179418_at   |
| WBGene00012398 | Y6E2A.4   | 179452_at   |
| WBGene00011292 | R102.5    | 179489_s_at |
| WBGene00009805 | F47B8.4   | 179492_at   |
| WBGene00013962 | ZK287.1   | 179539_at   |
| WBGene00010001 | F53F8.4   | 179553_at   |
| WBGene00007689 | C18E9.9   | 179607_at   |
| WBGene00008404 | D2013.6   | 179636_at   |
| WBGene00010658 | K08D8.4   | 179650_at   |
| WBGene00008975 | F20D1.3   | 179692_at   |
| WBGene00009429 | F35E12.5  | 179695_at   |
| WBGene00008739 | F13D12.3  | 179714_at   |
| WBGene00012783 | Y43C5A.3  | 179727_at   |
| WBGene00013065 | Y51A2B.1  | 179786_at   |
| WBGene00021048 | W05H9.1   | 179806_at   |
| WBGene00018348 | F42C5.6   | 179808_at   |
| WBGene00012940 | Y47D3B.3  | 179881_at   |
| WBGene00012941 | Y47D3B.4  | 179881_at   |
| WBGene00020311 | T07D3.9   | 179891_s_at |
| WBGene00017207 | fbxb-6    | 180197_at   |
| WBGene00017485 | F15E6.4   | 180398_s_at |
| WBGene00016061 | C24G6.6   | 180541_s_at |
| WBGene00019453 | K06H6.5   | 180645_at   |
| WBGene00010135 | F55H12.4  | 180707_at   |
| WBGene00006135 | str-74    | 180740_at   |
| WBGene00015573 | C07G1.7   | 180773_at   |
| WBGene00019563 | K09C6.9   | 180786_at   |
| WBGene00011190 | R10D12.9  | 180810_at   |
| WBGene00011191 | R10D12.10 | 180810_at   |
| WBGene00018643 | F49F1.1   | 180925_at   |
| WBGene00018646 | F49F1.6   | 180973_at   |
| WBGene00018647 | F49F1.7   | 181132_s_at |
| WBGene00020596 | oga-1     | 181147_s_at |
| WBGene00017117 | fbxb-80   | 181198_at   |
| WBGene00017488 | dct-7     | 181270_at   |
| WBGene00021011 | W03G1.5   | 181281_at   |
| WBGene00012980 | Y48B6A.6  | 181498_s_at |
| WBGene00018608 | F48E3.9   | 181649_at   |
| WBGene00018602 | F48D6.4   | 181694_at   |
| WBGene00013089 | Y51B9A.7  | 181764_at   |
| WBGene00007231 | C01G10.4  | 182405_at   |
| WBGene00044658 | C01G10.17 | 182405_at   |
| WBGene00017303 | F09F7.6   | 182470_at   |
| WBGene00015828 | math-14   | 182492_at   |
| WBGene00007833 | C31A11.5  | 182733_at   |
| WBGene00020760 | T24C4.4   | 182815_at   |

|                |           |             |
|----------------|-----------|-------------|
| WBGene00022757 | ZK488.5   | 182892_at   |
| WBGene00004157 | pqn-75    | 182930_at   |
| WBGene00018165 | F38A5.8   | 182939_at   |
| WBGene00010124 | F55G11.4  | 182970_at   |
| WBGene00016048 | C24B9.3   | 183010_s_at |
| WBGene00019090 | F59A7.2   | 183014_at   |
| WBGene00019921 | R07C3.5   | 183027_at   |
| WBGene00003091 | lys-2     | 183028_s_at |
| WBGene00020725 | T23C6.3   | 183310_s_at |
| WBGene00010128 | F55G11.8  | 183378_at   |
| WBGene00016923 | C54F6.5   | 183441_at   |
| WBGene00010746 | K10D11.2  | 183442_at   |
| WBGene00044073 | tag-244   | 183555_at   |
| WBGene00005684 | sru-21    | 183556_at   |
| WBGene00015756 | C14C6.2   | 183567_s_at |
| WBGene00017964 | F31F7.1   | 183621_at   |
| WBGene00010125 | dod-22    | 183624_at   |
| WBGene00022731 | ZK402.5   | 183757_at   |
| WBGene00015574 | C07G3.2   | 183876_at   |
| WBGene00020445 | T12B3.2   | 183900_at   |
| WBGene00011428 | T04C12.3  | 183970_at   |
| WBGene00015231 | B0511.5   | 183991_at   |
| WBGene00021106 | W09B7.1   | 184014_s_at |
| WBGene00021107 | W09B7.2   | 184103_s_at |
| WBGene00016419 | tyr-4     | 184158_at   |
| WBGene00010262 | F58E10.7  | 184175_at   |
| WBGene00000558 | cnc-4     | 184191_at   |
| WBGene00017858 | F27C1.11  | 184239_at   |
| WBGene00019660 | K11H12.4  | 184313_s_at |
| WBGene00017726 | F22H10.2  | 184400_at   |
| WBGene00019664 | K11H12.8  | 184428_at   |
| WBGene00019664 | K11H12.8  | 184429_s_at |
| WBGene00016027 | C23H5.8   | 184500_s_at |
| WBGene00015933 | C17H12.8  | 184533_at   |
| WBGene00015933 | C17H12.8  | 184534_s_at |
| WBGene00019909 | R06A10.1  | 184615_at   |
| WBGene00018439 | fbxa-184  | 184703_at   |
| WBGene00007873 | dod-21    | 184707_s_at |
| WBGene00021183 | Y9C9A.16  | 184710_at   |
| WBGene00018987 | F56F10.4  | 184753_at   |
| WBGene00017390 | F12A10.1  | 184868_at   |
| WBGene00017396 | F12A10.7  | 184868_at   |
| WBGene00019580 | K09E10.2  | 184950_at   |
| WBGene00015076 | B0238.12  | 185026_at   |
| WBGene00009434 | F35E12.10 | 185153_s_at |
| WBGene00021714 | cyh-1     | 185221_at   |
| WBGene00010473 | cdr-5     | 185275_at   |
| WBGene00003759 | nlp-21    | 185393_s_at |
| WBGene00003096 | lys-7     | 185557_s_at |

|                |            |             |
|----------------|------------|-------------|
| WBGene00016027 | C23H5.8    | 185619_s_at |
| WBGene00016097 | C25E10.8   | 185690_at   |
| WBGene00019021 | F57H12.6   | 186012_s_at |
| WBGene00013633 | Y105C5A.8  | 186052_at   |
| WBGene00019968 | R08F11.4   | 186072_s_at |
| WBGene00019541 | K08F11.1   | 186083_at   |
| WBGene00019830 | R02E12.6   | 186182_s_at |
| WBGene00018650 | F49F1.10   | 186243_at   |
| WBGene00013629 | srz-95     | 186509_at   |
| WBGene00017497 | F15E11.11  | 186523_s_at |
| WBGene00013986 | ZK512.7    | 186714_s_at |
| WBGene00012591 | Y38E10A.13 | 186726_at   |
| WBGene00018460 | F45D11.15  | 186801_s_at |
| WBGene00009192 | F27E5.1    | 186832_at   |
| WBGene00015935 | C17H12.10  | 187029_at   |
| WBGene00021141 | clec-134   | 187076_at   |
| WBGene00010320 | F59B10.4   | 187183_s_at |
| WBGene00017698 | F22B7.9    | 187282_at   |
| WBGene00008741 | F13D12.6   | 187323_at   |
| WBGene00015163 | B0361.9    | 187438_s_at |
| WBGene00022439 | Y110A2AL.2 | 187441_at   |
| WBGene00022725 | ZK381.2    | 187460_at   |
| WBGene00015265 | B0563.8    | 187504_at   |
| WBGene00022674 | ZK177.9    | 187540_at   |
| WBGene00020737 | T23F2.4    | 187571_at   |
| WBGene00002263 | lea-1      | 187999_at   |
| WBGene00001581 | gfi-1      | 188046_s_at |
| WBGene00001113 | dur-1      | 188100_s_at |
| WBGene00000633 | col-56     | 188191_at   |
| WBGene00002016 | hsp-16.2   | 188282_at   |
| WBGene00002088 | ins-5      | 188319_at   |
| WBGene00004394 | rol-1      | 188337_at   |
| WBGene00000673 | col-98     | 188356_at   |
| WBGene00002018 | hsp-16.41  | 188444_at   |
| WBGene00000715 | col-142    | 188500_at   |
| WBGene00014206 | nit-1      | 188607_at   |
| WBGene00000656 | col-80     | 188622_at   |
| WBGene00001168 | eft-3      | 188725_s_at |
| WBGene00016316 | C32D5.8    | 188744_s_at |
| WBGene00006628 | tsp-2      | 188927_at   |
| WBGene00019232 | ugt-13     | 188934_at   |
| WBGene00017121 | cyc-2.1    | 188940_at   |
| WBGene00010759 | K10H10.2   | 188978_s_at |
| WBGene00001229 | eif-3.F    | 189010_s_at |
| WBGene00007507 | C10C5.3    | 189069_at   |
| WBGene00002015 | hsp-16.1   | 189087_s_at |
| WBGene00005228 | srh-2      | 189126_s_at |
| WBGene00008451 | E01G6.3    | 189234_at   |
| WBGene00016147 | cyp-32A1   | 189264_s_at |

|                |          |             |
|----------------|----------|-------------|
| WBGene00008850 | F15B9.6  | 189419_at   |
| WBGene00000748 | col-175  | 189482_s_at |
| WBGene00019967 | cyp-33C8 | 189519_at   |
| WBGene00000282 | cah-4    | 189628_at   |
| WBGene00000749 | col-176  | 189629_at   |
| WBGene00008591 | F08H9.3  | 189643_at   |
| WBGene00006539 | tbb-6    | 189718_at   |
| WBGene00019890 | R05F9.6  | 189767_at   |
| WBGene00019207 | H17B01.1 | 189933_s_at |
| WBGene00000615 | col-38   | 189968_s_at |
| WBGene00018986 | F56F10.3 | 190361_s_at |
| WBGene00001500 | ftn-1    | 190427_s_at |
| WBGene00014173 | ZK970.7  | 190585_at   |
| WBGene00007605 | C15C8.3  | 190619_at   |
| WBGene00017970 | F32A5.4  | 190628_at   |
| WBGene00000287 | cal-3    | 190642_s_at |
| WBGene00017565 | F18E3.7  | 190646_s_at |
| WBGene00006930 | vit-6    | 190649_at   |
| WBGene00019584 | set-12   | 190725_at   |
| WBGene00010493 | meg-2    | 190730_at   |
| WBGene00007304 | ttr-39   | 190896_at   |
| WBGene00012383 | ttr-17   | 190906_at   |
| WBGene00001762 | gst-14   | 190929_at   |
| WBGene00000115 | alh-9    | 190995_at   |
| WBGene00001803 | lite-1   | 191026_s_at |
| WBGene00006627 | tsp-1    | 191038_at   |
| WBGene00005477 | srh-271  | 191265_at   |
| WBGene00006926 | vit-2    | 191323_at   |
| WBGene00005551 | sri-39   | 191340_at   |
| WBGene00005142 | srd-65   | 191387_at   |
| WBGene00005236 | srh-10   | 191493_at   |
| WBGene00000412 | cdr-1    | 191611_at   |
| WBGene00010539 | ttr-2    | 191676_at   |
| WBGene00012530 | Y32F6A.5 | 191775_s_at |
| WBGene00010470 | cdr-4    | 191871_s_at |
| WBGene00012144 | T28H10.3 | 192181_at   |
| WBGene00009221 | acs-2    | 192195_at   |
| WBGene00002026 | hsp-70   | 192266_s_at |
| WBGene00002012 | hsp-12.3 | 192338_at   |
| WBGene00001752 | gst-4    | 192407_at   |
| WBGene00023407 | cex-1    | 192450_at   |
| WBGene00007947 | C35A5.3  | 192528_at   |
| WBGene00009396 | clec-65  | 192559_s_at |
| WBGene00021043 | W05G11.6 | 192581_s_at |
| WBGene00004932 | sod-3    | 192617_at   |
| WBGene00004735 | sbp-1    | 192735_s_at |
| WBGene00011474 | T05D4.1  | 192888_s_at |
| WBGene00002262 | ldh-1    | 192972_at   |
| WBGene00005942 | srx-51   | 193367_at   |

|                |          |             |
|----------------|----------|-------------|
| WBGene00003655 | nhr-65   | 193567_at   |
| WBGene00009153 | F26D2.15 | 193573_at   |
| WBGene00003651 | nhr-61   | 193603_s_at |
| WBGene00003602 | nhr-3    | 193679_s_at |
| WBGene00009397 | clec-66  | 194067_at   |
| WBGene00001564 | gei-7    | 194142_x_at |
| WBGene00009963 | fipr-26  | 194157_s_at |
| WBGene00001684 | gpd-2    | 194177_x_at |
| WBGene00006927 | vit-3    | 194239_x_at |
