# Supplementary material for: GEI-8, a Homologue of Vertebrate Nuclear Receptor Corepressor NCoR/SMRT, Regulates Gonad Development and Neuronal Functions in Caenorhabditis elegans
Source: PLOS journal article supplement (doi:10.1371/journal.pone.0058462), 2013-03-06
Supplement: S3 (10.1371/journal.pone.0058462.s003) [file journal.pone.0058462.s003]

**Figure S3**

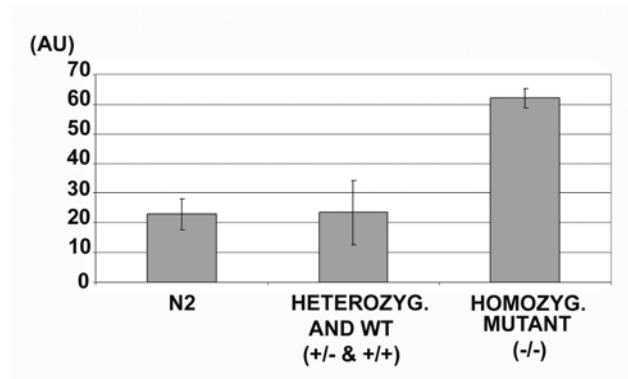

**Figure S3. Densitometric analysis of MitoTracker staining expressed in arbitrary units.** N2 wild-type animals, and the progeny of heterozygous mutant parents divided according to the mutant phenotype to phenotypically normal heterozygous (+/-) and phenotypically homozygous (-/-) animals were analyzed. Elevated staining by MitoTracker in homozygous mutant larvae is statistically significant in paired Student's T-test compared to both N2 and morphologically unaffected progeny of heterozygous parents ( $p < 0.01$ ).
